# Supplementary material
Source: PubMed Central journal article supplement (PMC1851612)
Supplement: pnas_0609675104_1.pdf [file pnas_0609675104_1.pdf]

input  
input mouse  
1 2 3 4 5

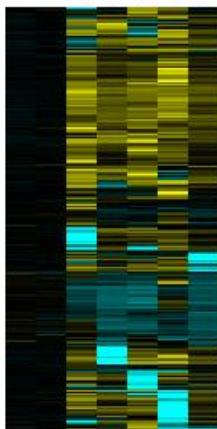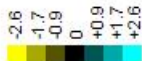

} Clones overrepresented in mouse 1  
} Clones overrepresented in mouse 5  
  
} Clones overrepresented in mouse 2  
} Clones overrepresented in mouse 3  
} Clones overrepresented in mouse 4
