# Supplementary material
Source: PubMed Central journal article supplement (PMC1851612)

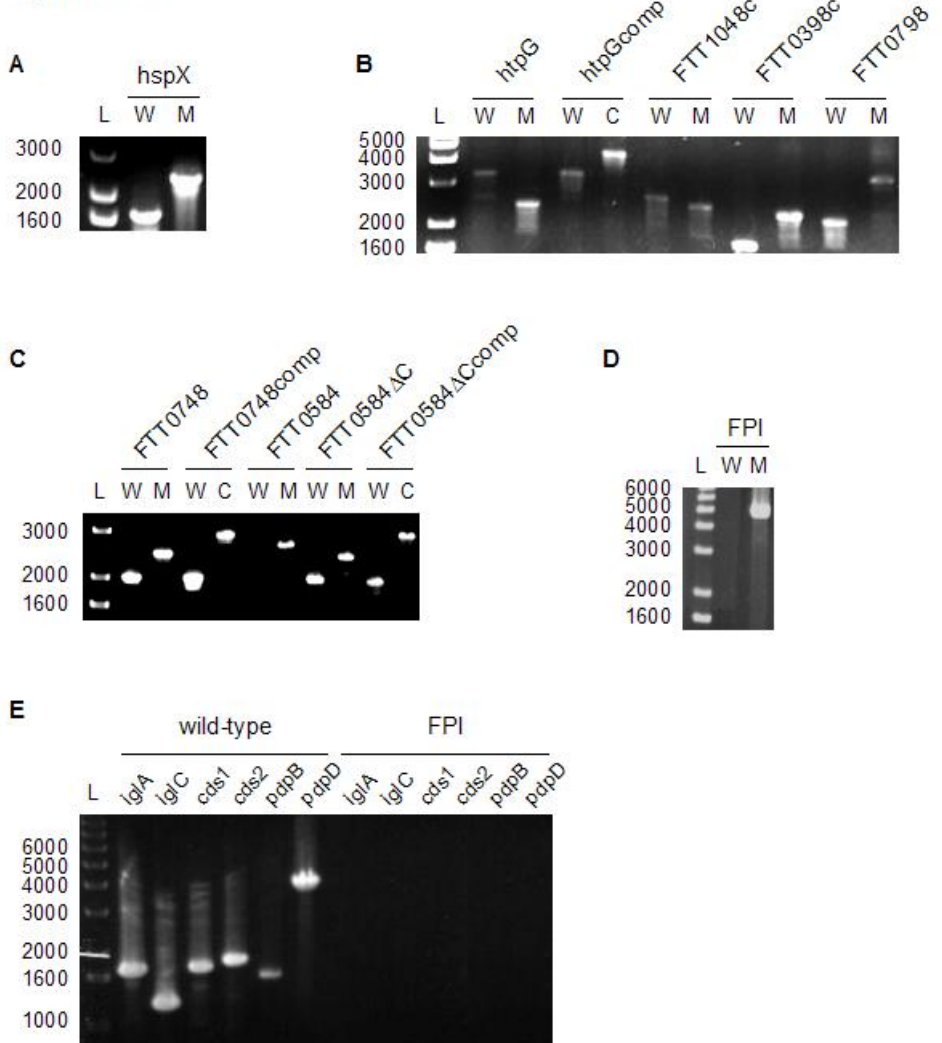

Supplement: pnas_0609675104_2.pdf [file pnas_0609675104_2.pdf]

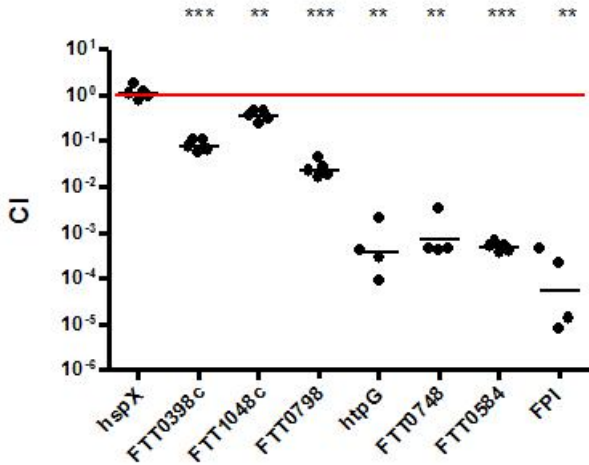

Supplement: pnas_0609675104_3.pdf [file pnas_0609675104_3.pdf]

A

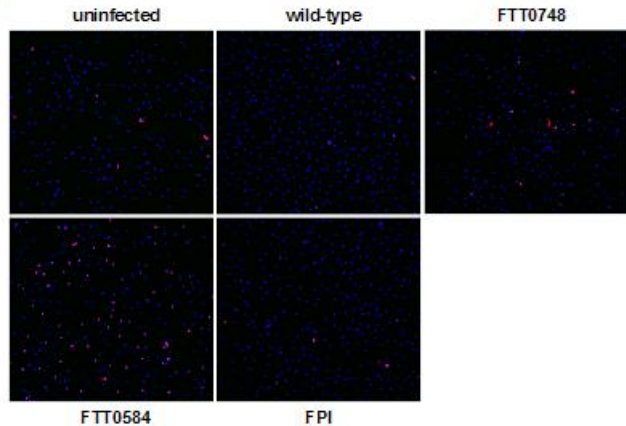

B

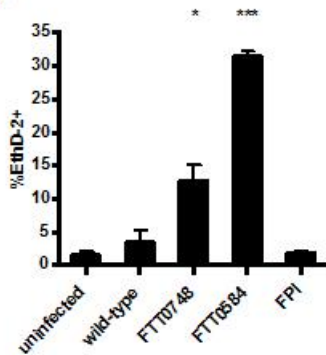

Supplement: pnas_0609675104_4.pdf [file pnas_0609675104_4.pdf]

30 min

60 min

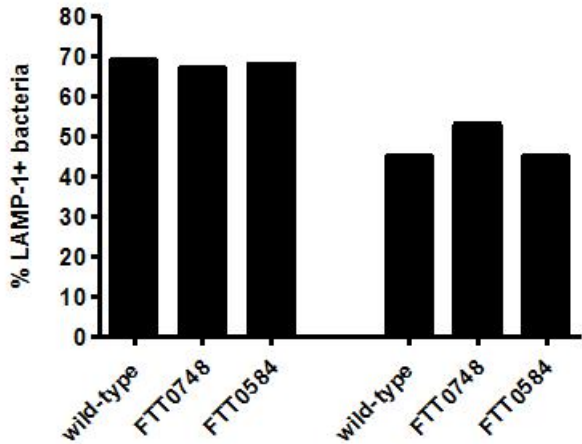

Supplement: pnas_0609675104_5.pdf [file pnas_0609675104_5.pdf]

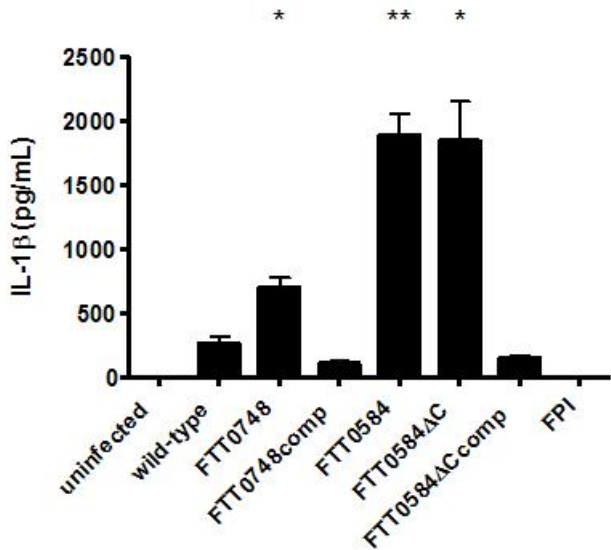

Supplement: pnas_0609675104_6.pdf [file pnas_0609675104_6.pdf]
